# Supplementary material for: Assessment of healing dynamics in dental extraction sockets among non-diabetic, prediabetic, and type 2 diabetic patients: a comparative clinical investigation
Source: PeerJ. 2025 Nov 20;13:e20361. doi: 10.7717/peerj.20361 (PMC12640633; doi:10.7717/peerj.20361)
Supplement: Supplemental Information 1 [file peerj-13-20361-s001.xlsx]

## Sheet: codes 1
groups
non diabetic	1
pre diabetic	2
diabetic	3
gender
male	1
female	2
complications
none	1
swelling	2
infection	3
discharge	4
complications	5
pain
mild	1
moderate	2
severe	3

## Sheet: Data
group	age	gender	day 0	day 7	complications	pain
1	42	1	1.9	1	1	1
1	46	1	3.9	0.9	1	1
1	41	2	2	0.5	1	1
1	39	1	2.8	1.2	1	1
1	58	1	4.3	1.4	2	2
1	56	2	4.1	1.4	2	2
1	33	2	3.5	1.2	1	1
1	52	2	5	2.4	1	1
1	56	1	5.2	2.1	2	3
1	49	1	2.5	0.8	1	1
1	39	1	3.7	1.1	1	1
1	57	1	4.4	1.8	2	3
1	45	2	4.8	2.2	1	1
1	58	1	5.2	2.1	1	2
1	32	2	3	1.1	1	1
1	29	1	3.7	1.5	1	2
1	32	1	2.4	0.8	1	1
1	34	1	4.2	2	1	1
1	60	2	6	2.8	1	3
1	62	1	5.3	1	1	3
1	39	1	4.1	1.9	1	1
1	30	2	4.9	1.7	1	1
1	62	2	5.6	2.1	1	2
1	54	2	5.6	2	1	2
2	58	2	2	1	1	1
2	56	1	3.9	0.9	1	1
2	44	2	2	0.5	1	1
2	41	1	1.8	1.2	1	1
2	58	1	4.3	1.4	1	1
2	56	1	4.1	1.4	1	1
2	39	2	1.5	1.2	1	1
2	54	2	5	2.4	1	1
2	58	2	5.2	2.1	2	2
2	49	1	2.5	1.1	1	1
2	43	1	3.7	1.4	1	2
2	57	2	4.4	2	1	3
2	48	2	4.8	2.2	1	1
2	64	1	5.2	2.1	2	2
2	32	2	3	1.1	1	1
2	34	1	3.7	2.1	1	2
2	44	1	2.4	0.8	1	1
2	34	2	4.2	2.3	2	1
2	59	2	6	3.1	3	2
2	62	1	5.3	1	2	1
2	39	1	4.1	1.9	1	1
2	34	2	4.9	2	1	1
2	62	2	5.6	2.1	3	2
2	54	2	5.6	3.1	1	1
3	56	1	3.2	2.3	1	1
3	56	1	4.4	2.5	2	2
3	44	2	5.1	2.8	3	2
3	39	1	3.2	1.2	1	1
3	58	2	4.3	2.6	1	1
3	56	1	4.1	2.1	1	2
3	39	2	3.4	1.2	1	1
3	52	2	5	2.4	3	3
3	55	1	5.2	3	2	2
3	49	1	2.7	1.1	1	1
3	43	1	4.4	1.4	1	2
3	51	2	4.9	2.4	2	2
3	48	2	5	3.1	2	3
3	60	1	5.3	2.1	4	3
3	32	2	4	2.7	1	2
3	30	1	5.1	2.1	1	3
3	40	1	3.2	1.8	1	1
3	31	2	4.2	2.3	1	2
3	59	1	6.2	4	5	3
3	61	1	6	3.5	3	3
3	32	1	6	3.1	4	3
3	34	2	4.9	2.4	1	1
3	60	2	5.6	2.1	2	2
3	54	2	5.2	2.9	3	2
