# Supplementary material for: Assessment of healing dynamics in dental extraction sockets among non-diabetic, prediabetic, and type 2 diabetic patients: a comparative clinical investigation
Source: PeerJ. 2025 Nov 20;13:e20361. doi: 10.7717/peerj.20361 (PMC12640633; doi:10.7717/peerj.20361)
Supplement: Supplemental Information 2 [file peerj-13-20361-s002.xlsx]

## Sheet: Sheet1
Baseline		Day 3		Day 5		Day 7
Group 1	Group 2	Group 1	Group 2	Group 1	Group 2	Group 1	Group 2
9	8	4	4	0	0	0	0
9	8	4	4	0	1	0	0
9	8	4	4	0	1	0	0
9	8	4	4	0	0	0	0
9	8	4	4	0	0	0	0
9	8	4	4	0	1	0	0
9	8	4	4	0	1	0	0
9	8	4	4	0	0	0	0
9	8	4	4	0	0	0	0
9	8	4	4	0	1	0	0
9	8	4	4	0	0	0	0
9	8	4	4	0	0	0	0
9	8	4	4	0	0	0	0
9	8	4	4	1	0	0	0
9	8	4	4	1	0	0	0
8	8	4	4	1	0	0	0
8	8	4	4	1	0	0	0
8	8	4	4	1	0	0	0
8	8	4	4	1	0	0	0
8	8	4	4	1	0	0	0
8	8	4	4	1	0	0	0
8	8	4	4	1	0	0	0
9	9	4	4	1	0	0	0
9	9	4	4	1	0	0	0
9	9	4	4	1	0	0	0
9	9	4	4	1	0	0	0
9	9	2	2	1	0	0	0
9	9	2	2	2	0	0	0
9	9	4	2	2	0	0	0
10	10	4	2	2	0	0	0
10	10	4	2	2	0	0	0
10	10	4	2	2	0	0	0
10	10	4	2	2	0	0	0
10	10	4	1	2	0	0	0
10	10	4	1	2	0	0	0
10	10	4	4	2	0	0	0
10	10	4	2	2	0	0	0
9	9	4	2	2	0	0	0
9	9	4	2	2	2	0	0
9	9	4	2	2	0	0	0
9	9	4	4	2	2	0	0
9	9	4	4	1	0	0	0
7	7	4	4	1	0	0	0
7	7	3	3	1	0	0	0
9	9	4	4	2	0	0	0
